# Supplementary material for: Organosulfates in atmospheric aerosol: synthesis and quantitative analysis of PM 2.5 from Xi’an, Northwest China
Source: Copernicus journal article supplement (doi:10.5194/amt-2018-104), 2018-04-06
Supplement: Supplementary file [file amt-2018-104-AC1-supplement.pdf]

The  $^1\text{H}$  NMR and  $^{13}\text{C}$  NMR spectra of synthesized organosulfate standards are shown in Figure S1-S8 below. These  $^1\text{H}$  NMR and  $^{13}\text{C}$  NMR spectra were recorded on a Bruker Advance-III 400 MHz spectrometer at 400 and 100 MHz, respectively using trimethylsilane (TMS) as an internal standard.

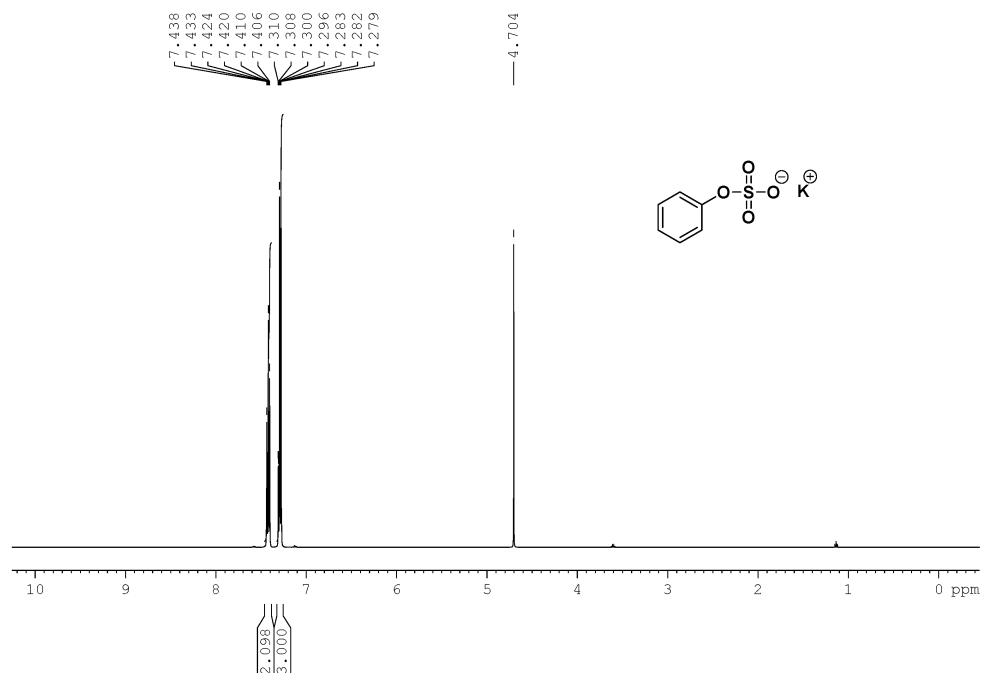

Figure S1.  $^1\text{H}$  NMR spectrum of potassium phenyl sulfate in  $\text{D}_2\text{O}$ .

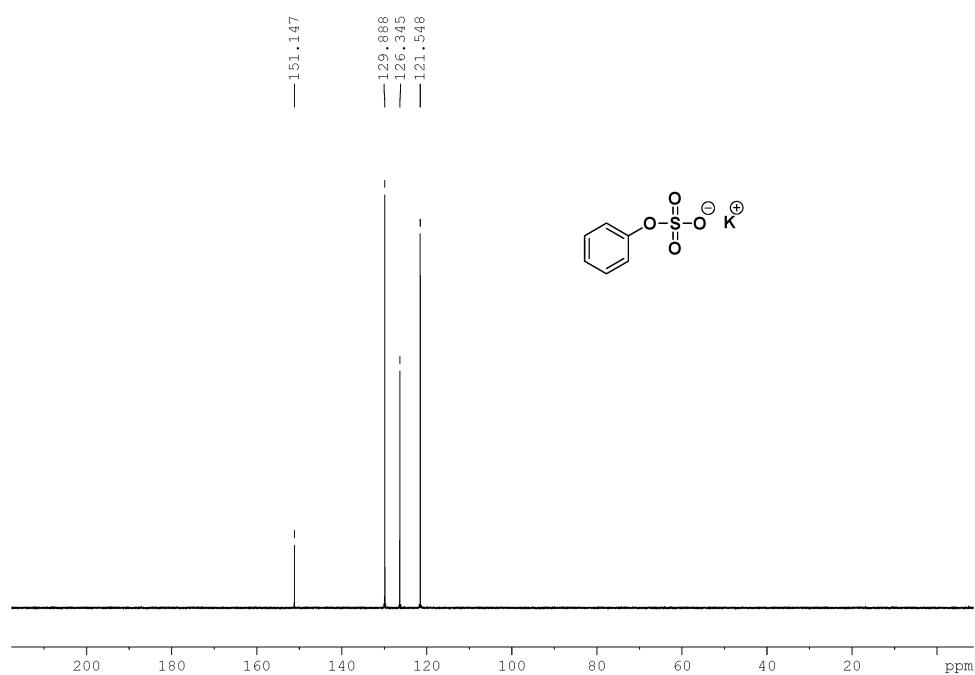

Figure S2.  $^{13}\text{C}$  NMR spectrum of potassium phenyl sulfate in  $\text{D}_2\text{O}$ .

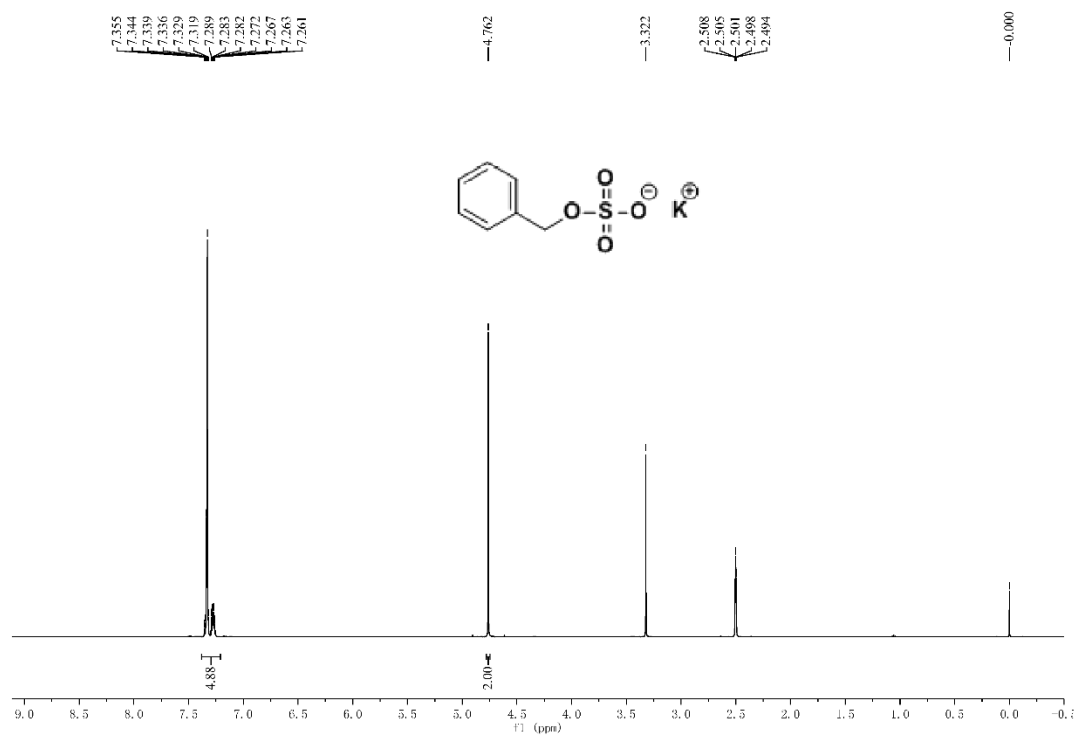

Figure S3.  $^1\text{H}$  NMR spectrum of potassium benzyl sulfate in  $\text{DMSO-}d_6$ .

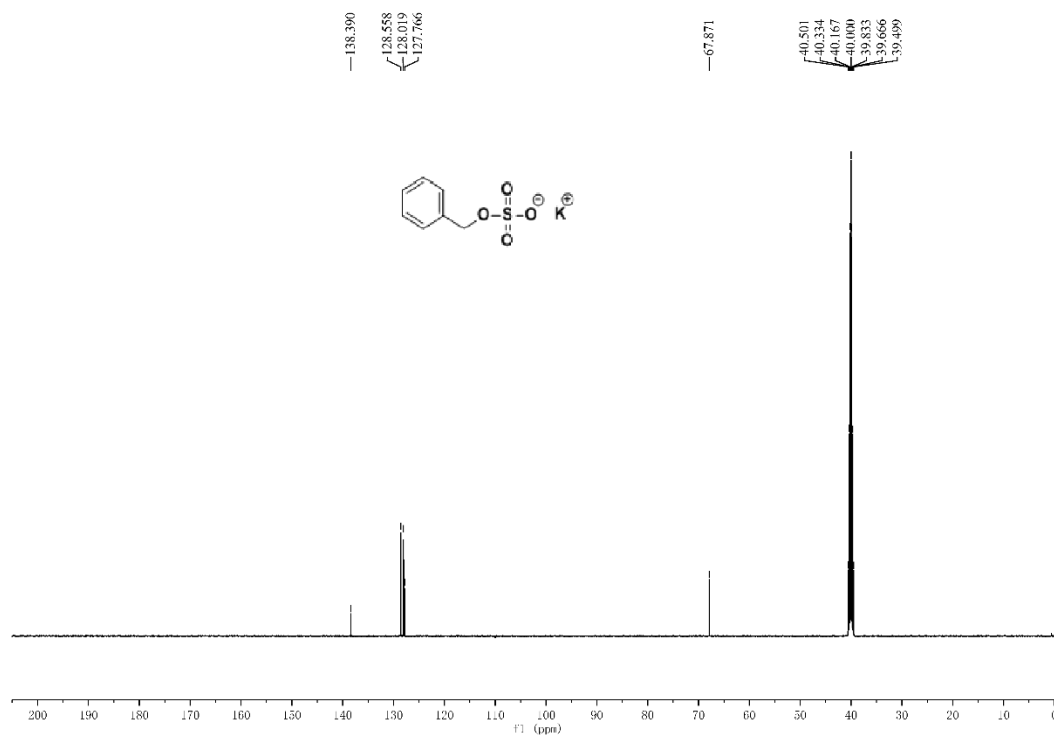

Figure S4. <sup>13</sup>C NMR spectrum of potassium benzyl sulfate in DMSO-*d*<sub>6</sub>.

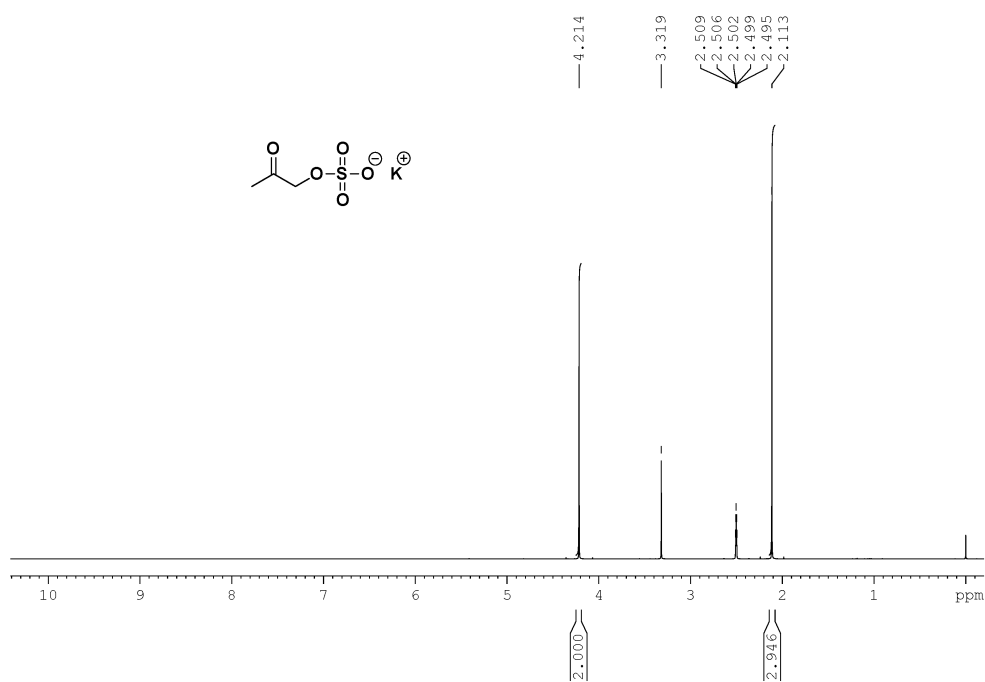

Figure S5. <sup>1</sup>H NMR spectrum of potassium hydroxyacetone sulfate in DMSO-*d*<sub>6</sub>.

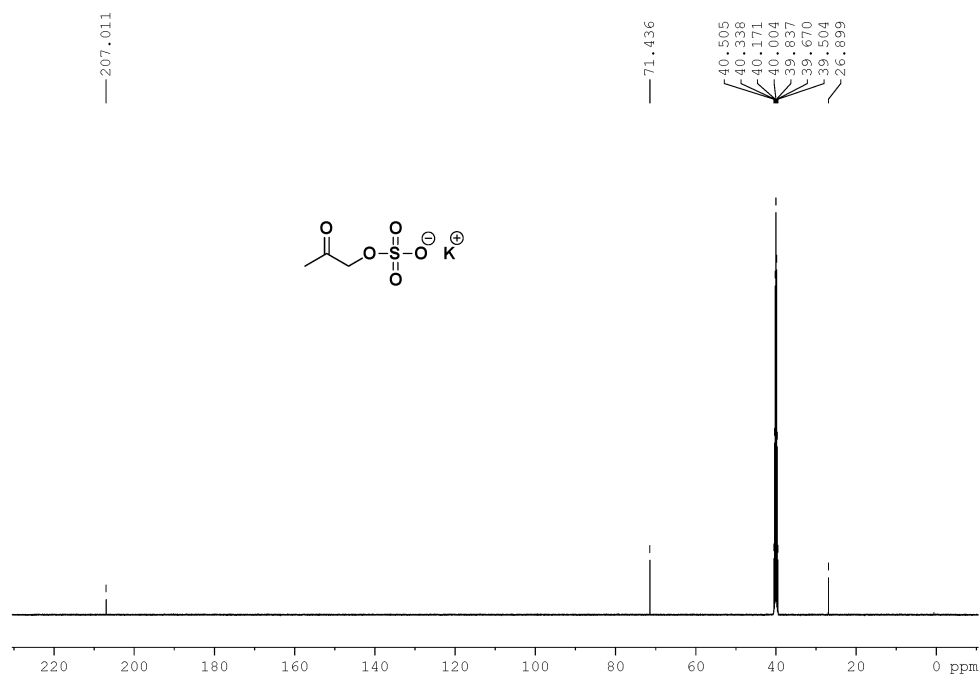

Figure S6.  $^{13}\text{C}$  NMR spectrum of potassium hydroxyacetone sulfate in  $\text{DMSO-}d_6$ .

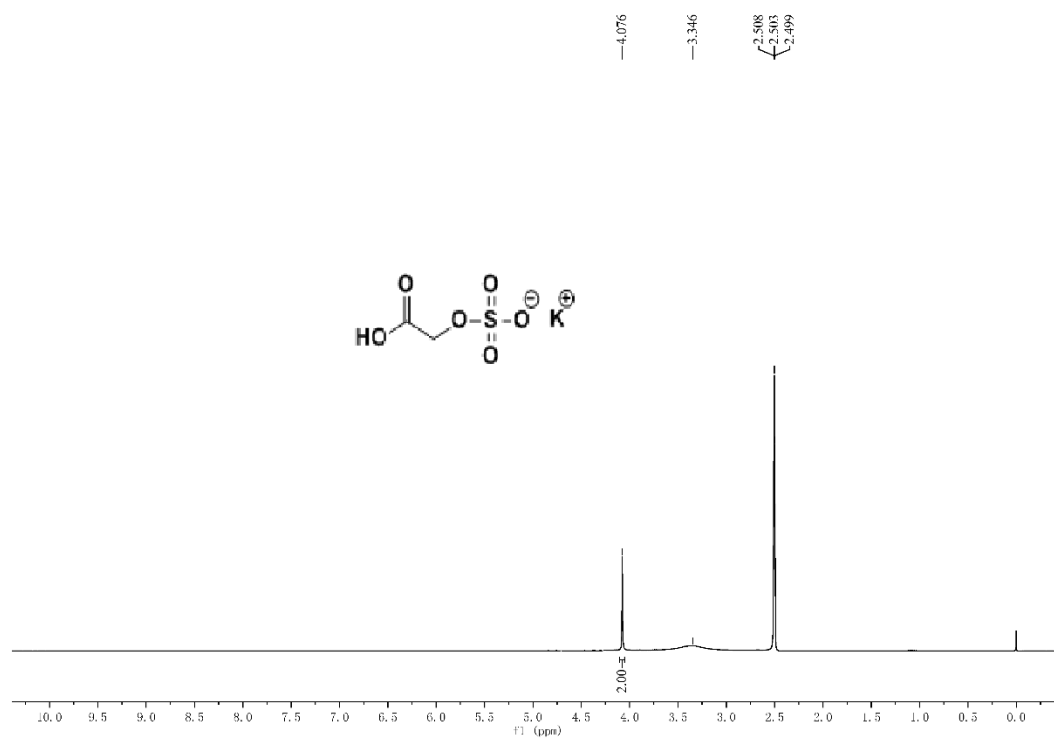

Figure S7.  $^1\text{H}$  NMR spectrum of potassium glycolic acid sulfate in  $\text{DMSO-}d_6$ .

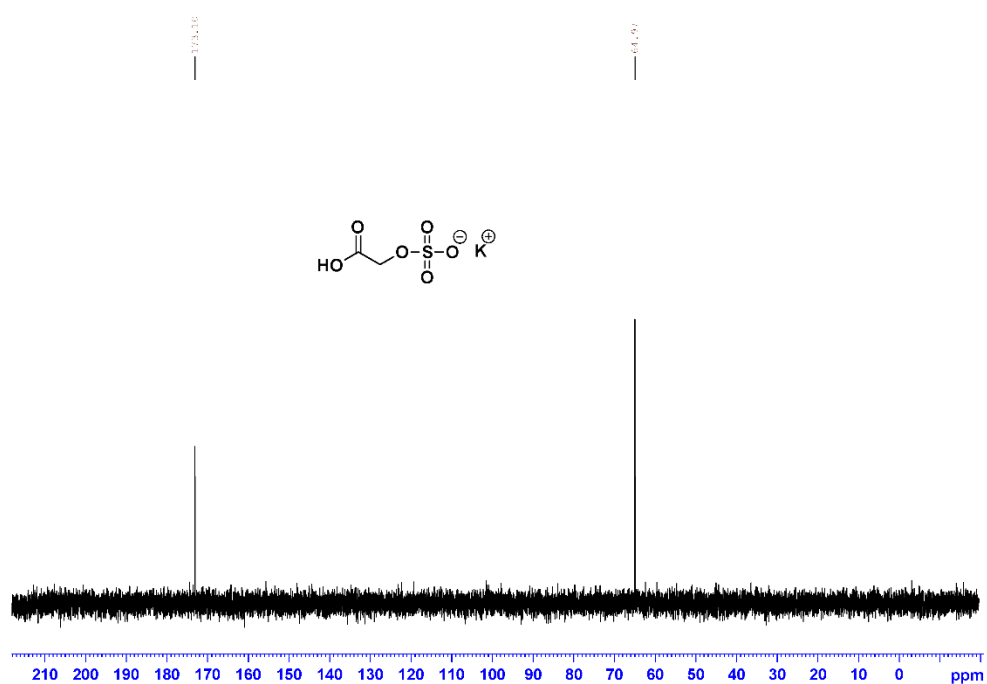

Figure S8.  $^{13}\text{C}$  NMR spectrum of potassium glycolic acid sulfate in  $\text{D}_2\text{O}$ .
